# Supplementary figures and images for: MiR‐10b inhibits migration and invasion of pancreatic ductal adenocarcinoma via regulating E2F7
Source: PubMed Central journal article supplement — J Clin Lab Anal. 2020 Jun 26;34(10):e23442. doi: 10.1002/jcla.23442 (PMC7595905; doi:10.1002/jcla.23442), 2020-06-26

A

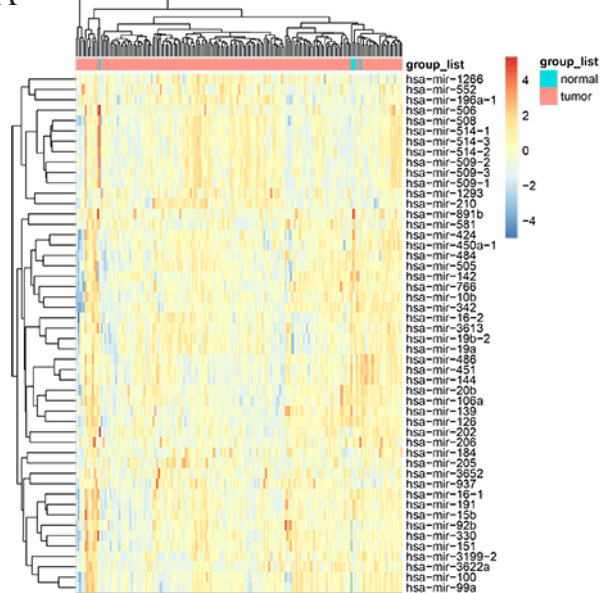

B

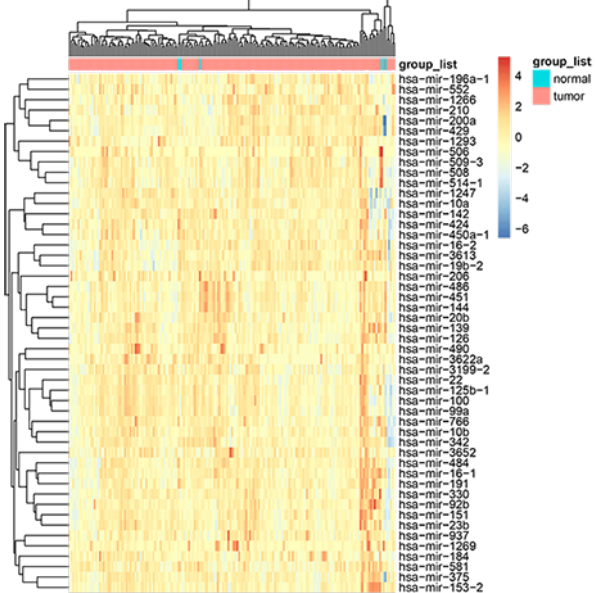

C

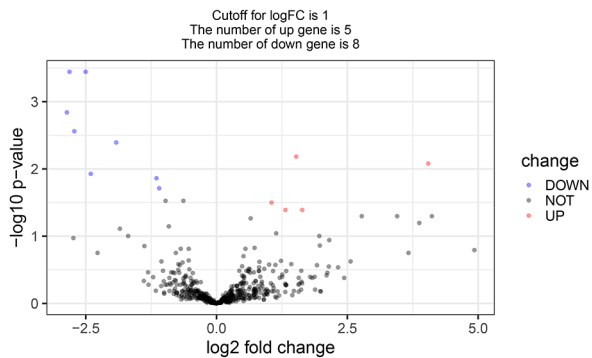

D

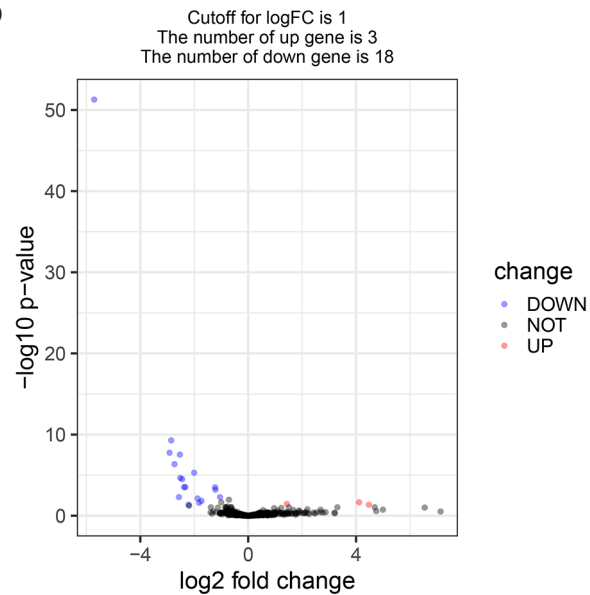

Supplement: JCLA-34-e23442-s001.pdf [file JCLA-34-e23442-s001.pdf]

A

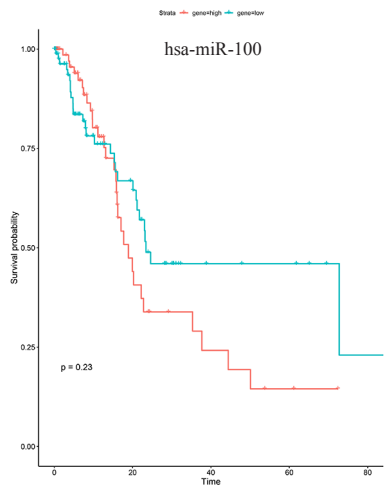

B

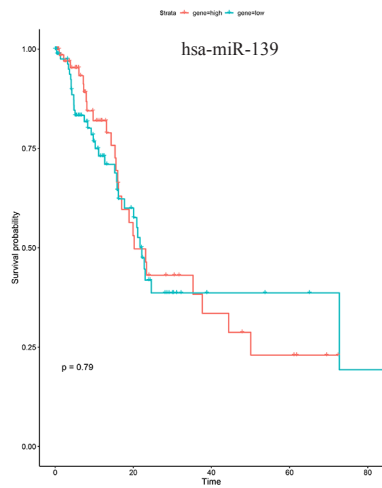

C

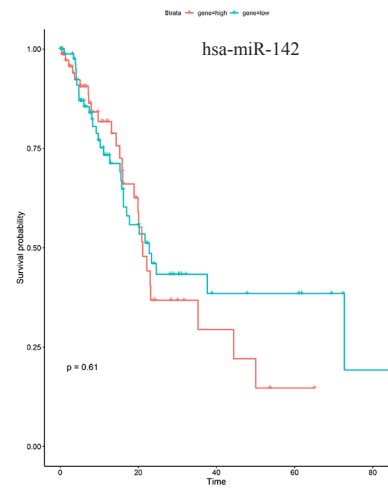

D

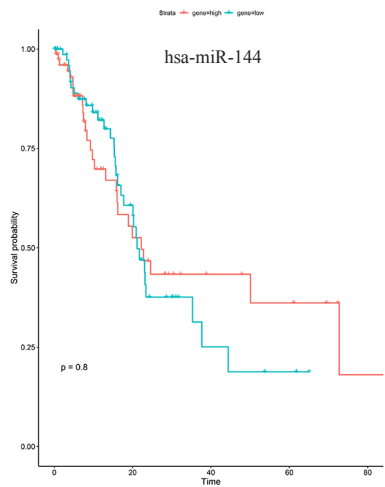

E

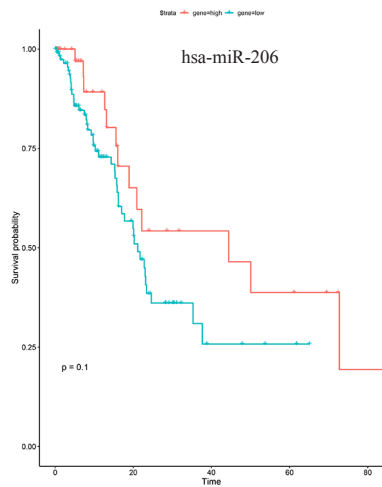

F

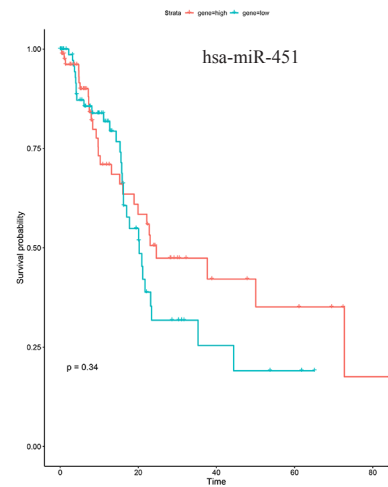

Supplement: JCLA-34-e23442-s002.pdf [file JCLA-34-e23442-s002.pdf]
